# Supplementary material for: Interactions between Parents and Parents and Pups in the Monogamous California Mouse (Peromyscus californicus)
Source: PubMed Central journal article supplement (PMC3777941; doi:10.1371/journal.pone.0075725), 2013-09-19

**A Average Number of Times Sniffing Pups**

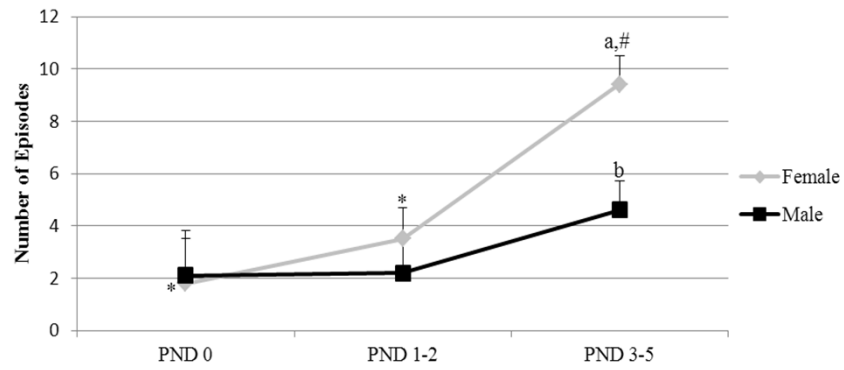

**B Average Number of Times Sniffing Pups**

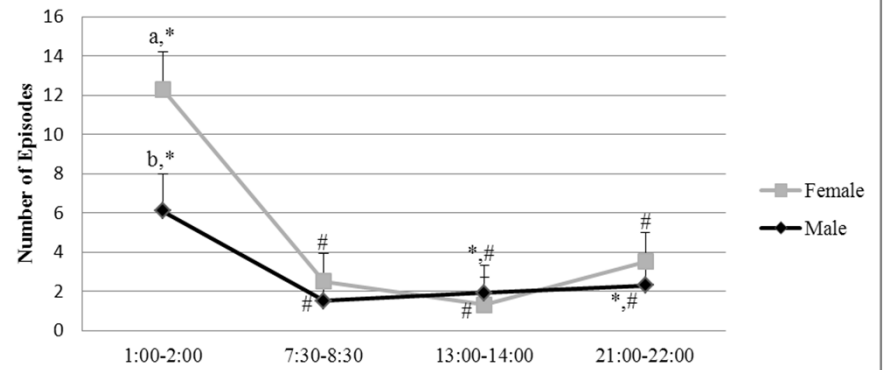

Supplement: pone.0075725.s003.pdf [file pone.0075725.s003.pdf]
