# Supplementary material for: Interactions between Parents and Parents and Pups in the Monogamous California Mouse (Peromyscus californicus)
Source: PubMed Central journal article supplement (PMC3777941; doi:10.1371/journal.pone.0075725), 2013-09-19

**A** Average Combined Times Parents Spent Grooming Pups

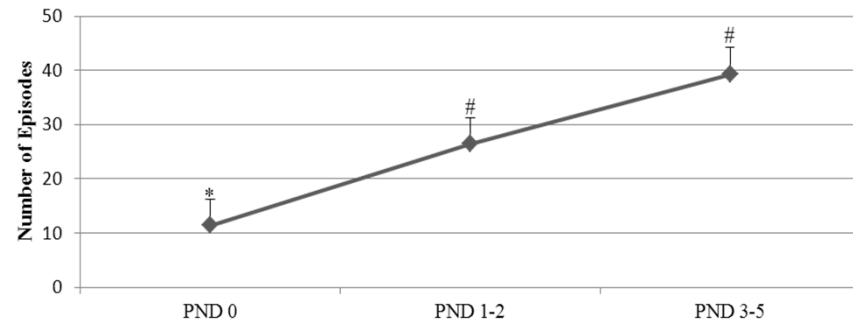

**B** Average Combined Duration of Time Parents Spent Grooming Pups

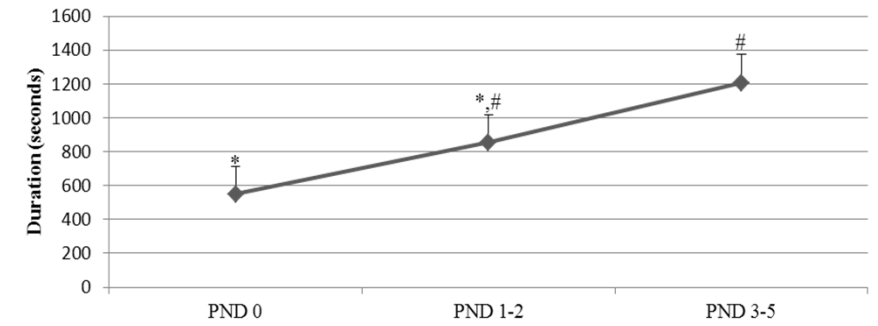

**C** Average Combined Times Parents Spent Grooming Pups

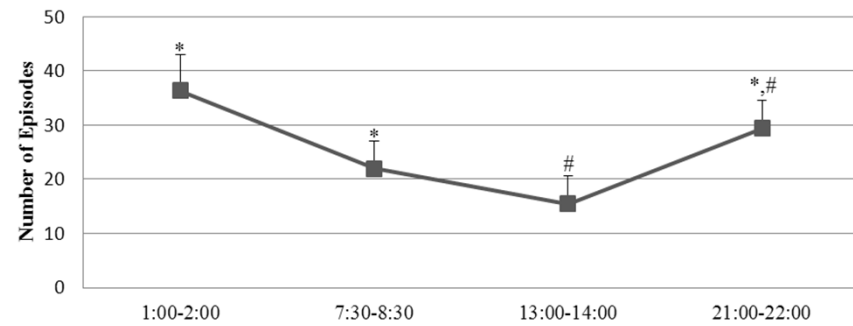

**D** Average Combined Duration of Time Parents Spent Grooming Pups

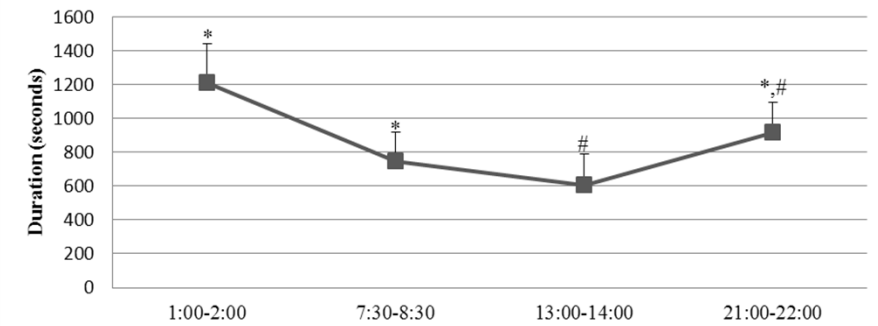

Supplement: pone.0075725.s004.pdf [file pone.0075725.s004.pdf]
