# Supplementary material for: Interactions between Parents and Parents and Pups in the Monogamous California Mouse (Peromyscus californicus)
Source: PubMed Central journal article supplement (PMC3777941; doi:10.1371/journal.pone.0075725), 2013-09-19

## Average Pup Body Weight

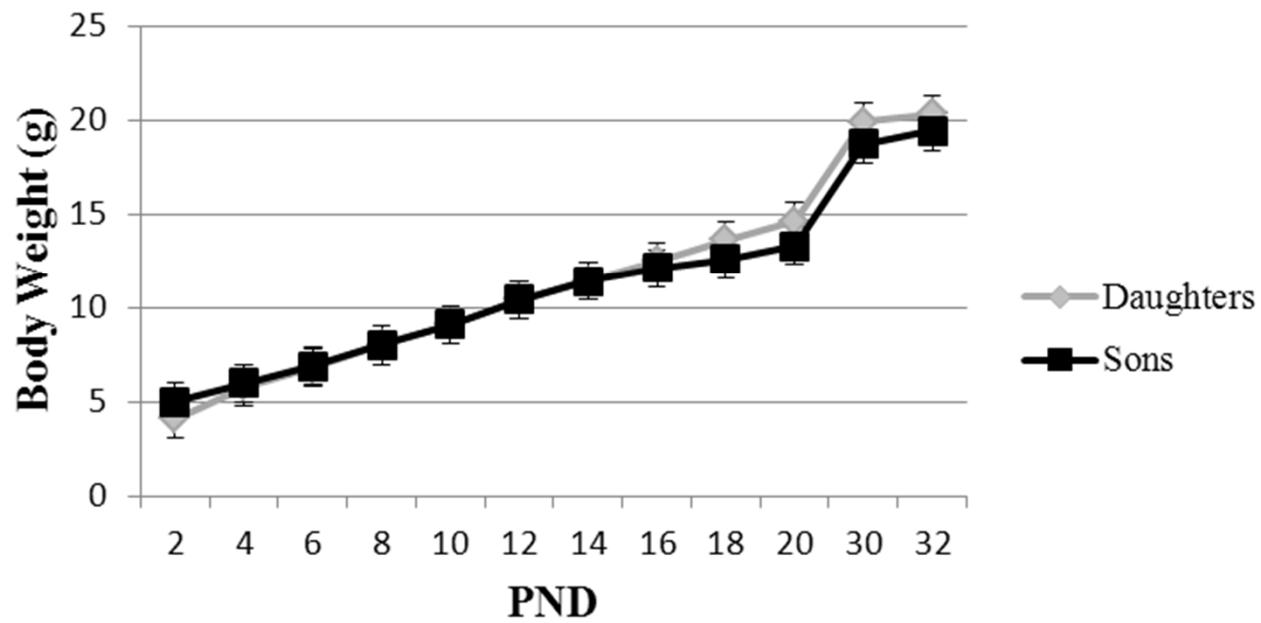

Supplement: pone.0075725.s006.pdf [file pone.0075725.s006.pdf]
